# Supplementary material for: Performance of interpolation methods in digital soil mapping: the influence of data characteristics
Source: Research Square preprint supplement (doi:10.21203/rs.3.rs-8020454/v1), 2025-11-20
Supplement: Supplementary file 1 [file 4a21f17f8d993b767b3e0fa8.docx]

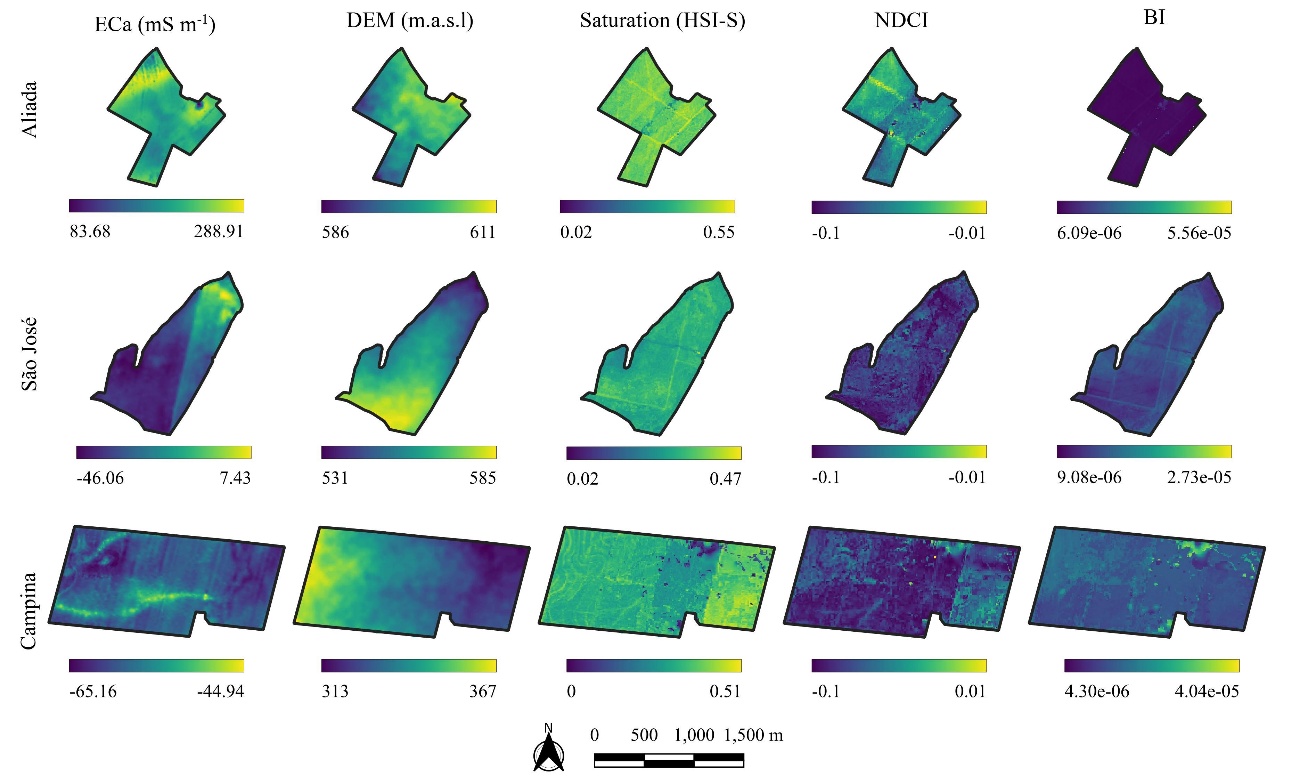


FigS1. Spatial distribution of the covariates used in study areas


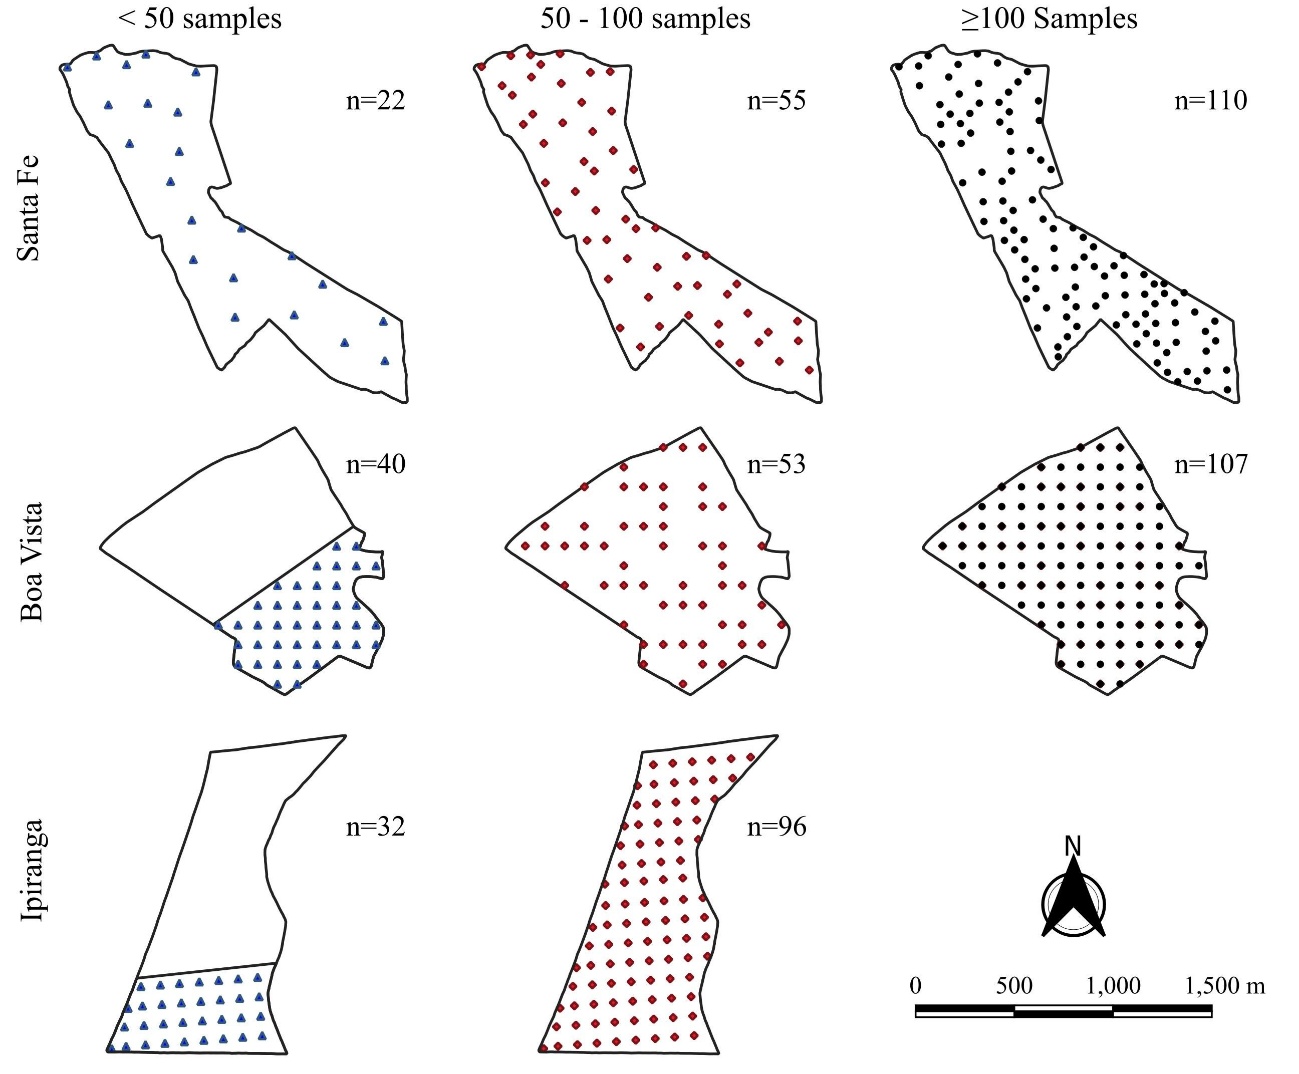


FigS2. Spatial distribution of samples in the validation areas for <50, 50–100, and ≥100 sample scenarios.


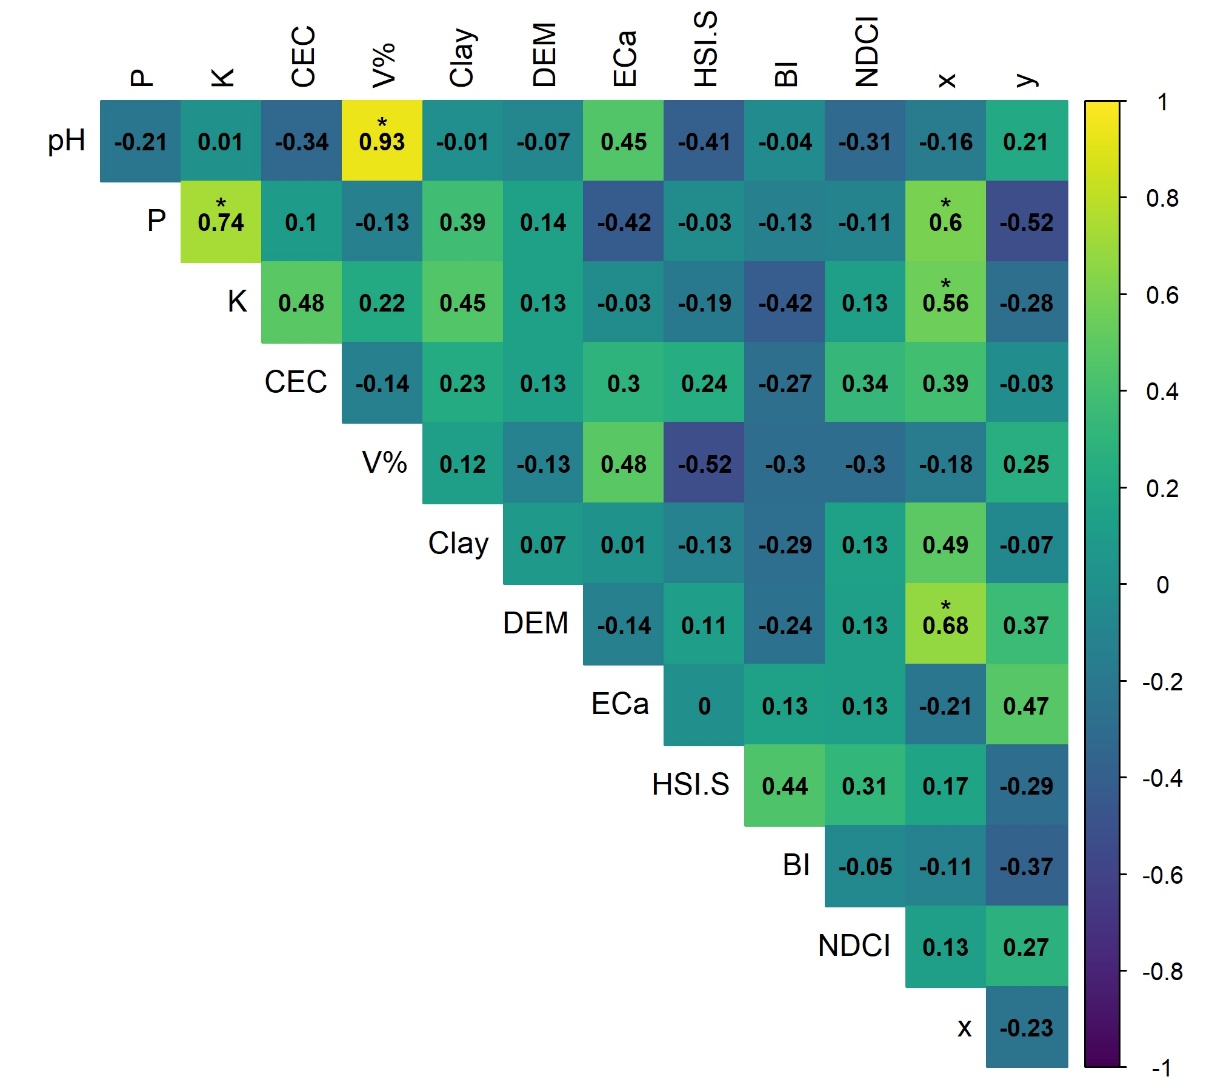


FigS3. Correlation matrix for Aliada farm in 0.2 samples ha-1. P: phosphorus, K: potassium, CEC: cation exchange capacity, V%: base saturation, Clay: clay content, DEM: digital elevation model, ECa: apparent electrical conductivity, HSI.S: saturation component of the RGB to HSI transform, NDCI: normalized difference clay index, SBI: soil brightness index, x,y: spatial coordinates.


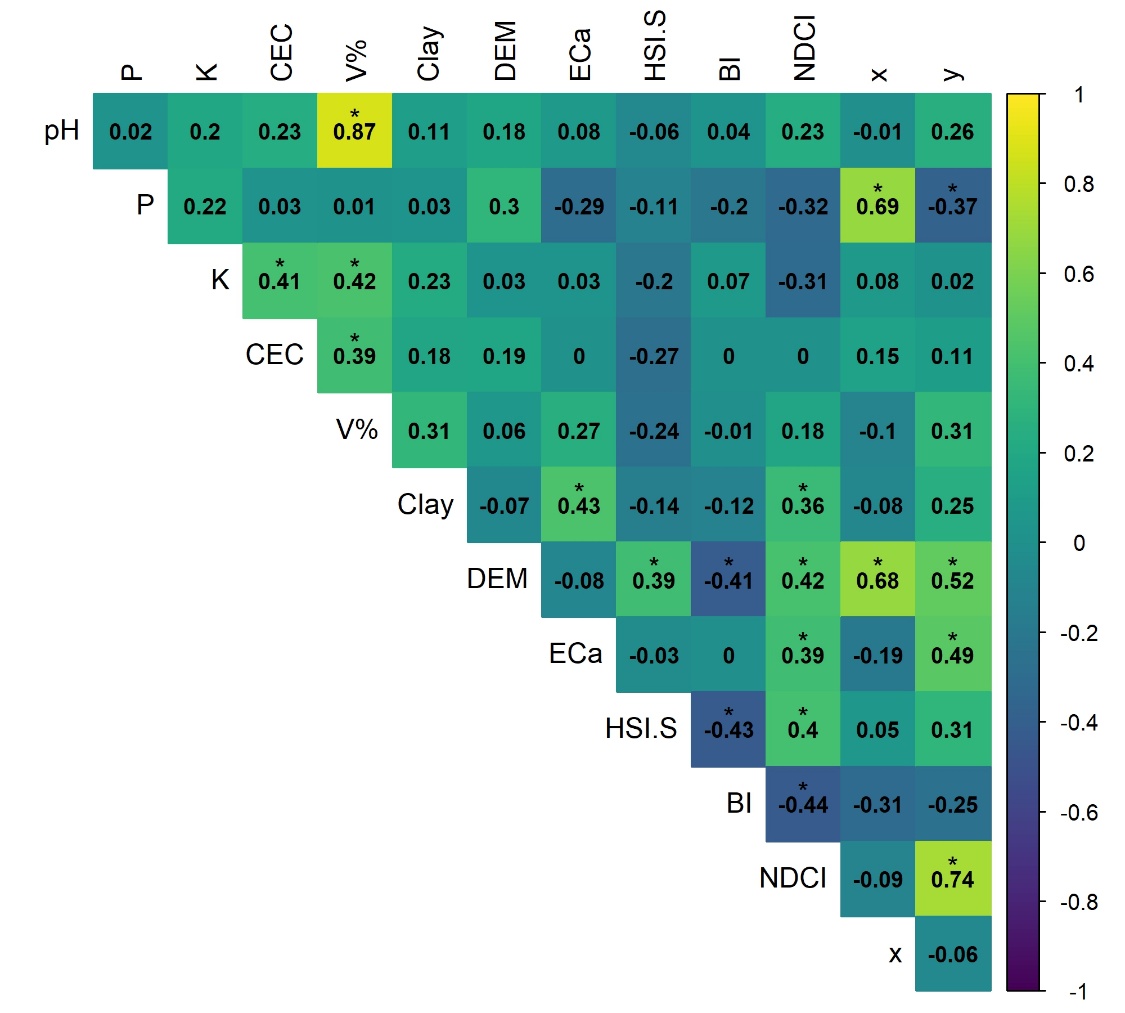


FigS4. Correlation matrix for Aliada farm in 0.5 samples ha-1. P: phosphorus, K: potassium, CEC: cation exchange capacity, V%: base saturation, Clay: clay content, DEM: digital elevation model, ECa: apparent electrical conductivity, HSI.S: saturation component of the RGB to HSI transform, NDCI: normalized difference clay index, SBI: soil brightness index, x,y: spatial coordinates.


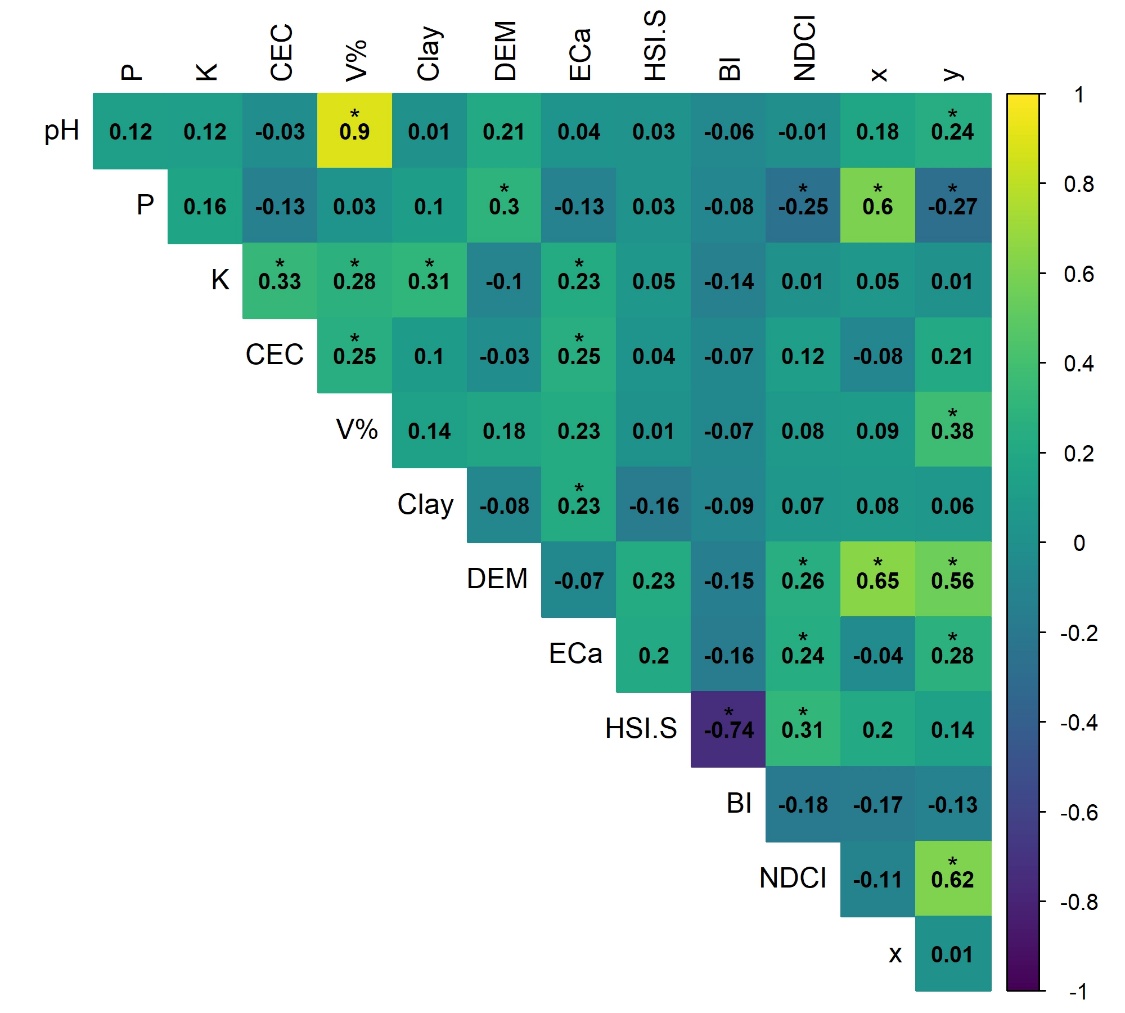


FigS5. Correlation matrix for Aliada farm in 1 sample ha-1. P: phosphorus, K: potassium, CEC: cation exchange capacity, V%: base saturation, Clay: clay content, DEM: digital elevation model, ECa: apparent electrical conductivity, HSI.S: saturation component of the RGB to HSI transform, NDCI: normalized difference clay index, SBI: soil brightness index, x,y: spatial coordinates.


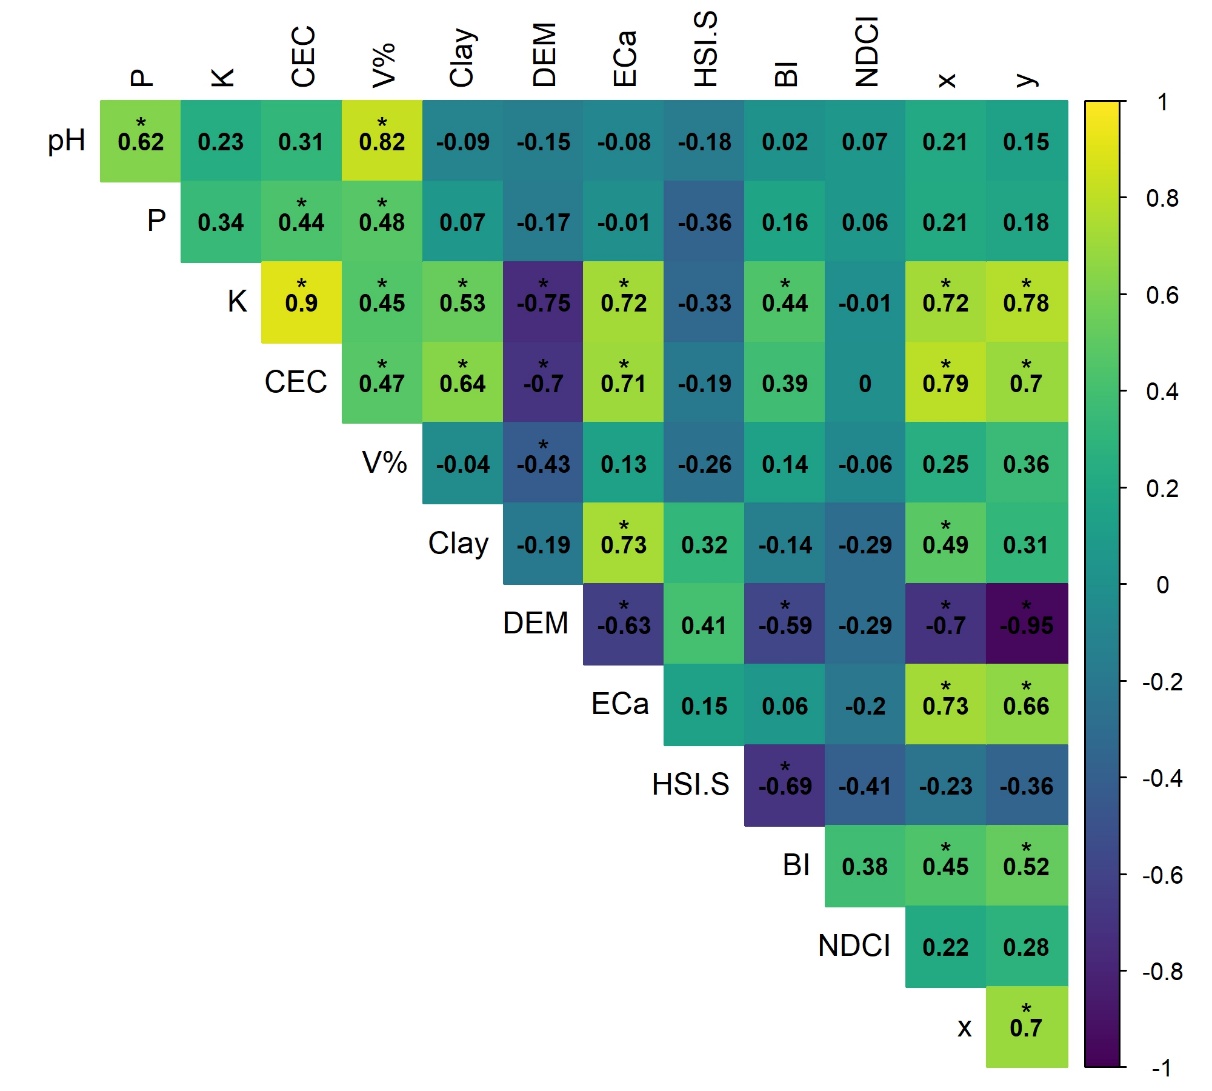


FigS6. Correlation matrix for São José farm in 0.2 samples ha-1. P: phosphorus, K: potassium, CEC: cation exchange capacity, V%: base saturation, Clay: clay content, DEM: digital elevation model, ECa: apparent electrical conductivity, HSI.S: saturation component of the RGB to HSI transform, NDCI: normalized difference clay index, SBI: soil brightness index, x,y: spatial coordinates.


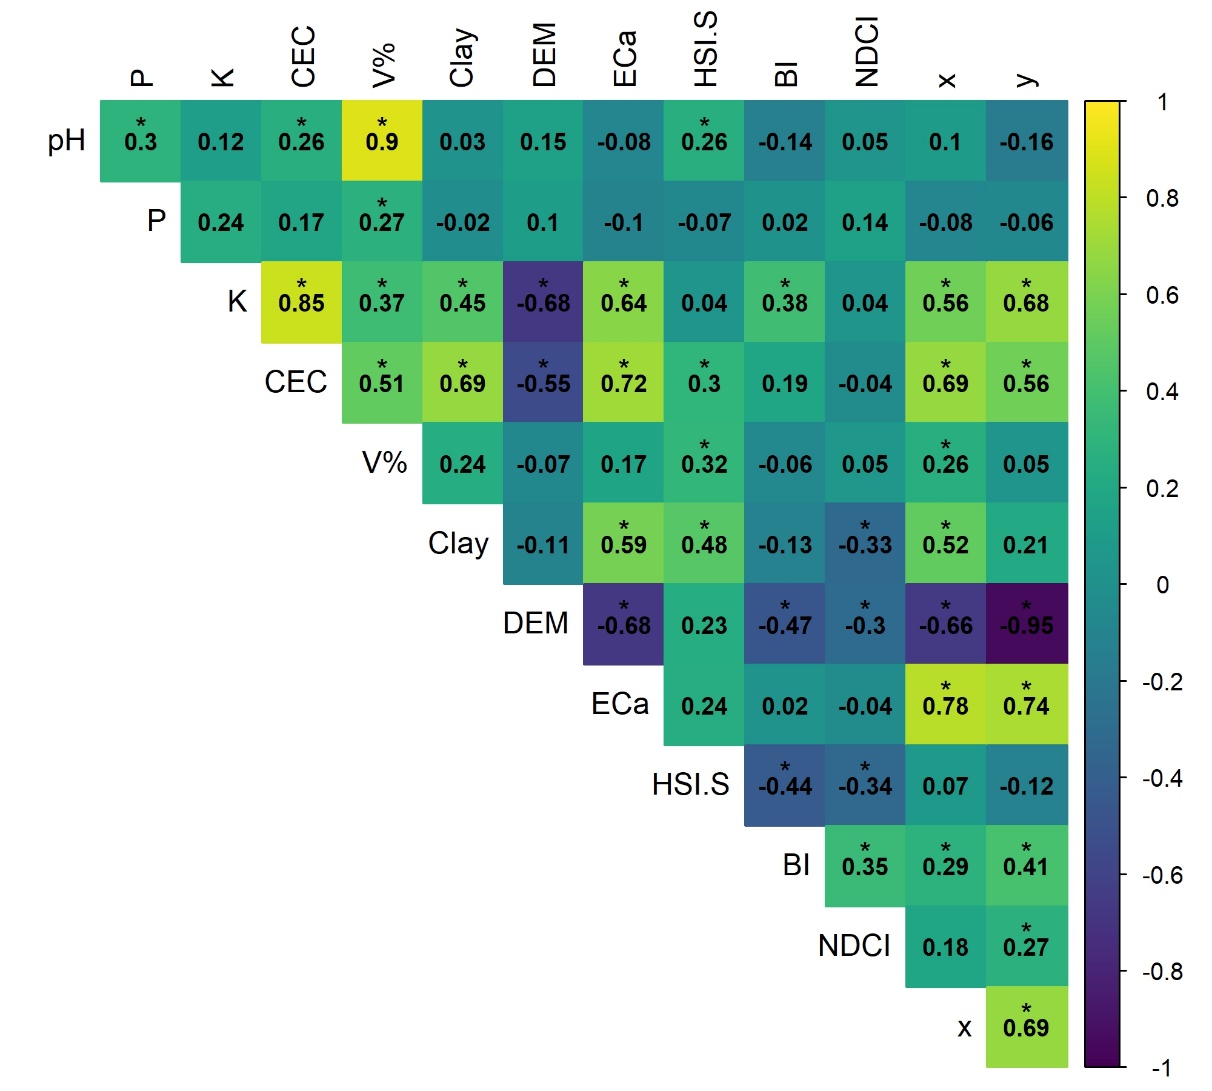


FigS7. Correlation matrix for São José farm in 0.5 samples ha-1. P: phosphorus, K: potassium, CEC: cation exchange capacity, V%: base saturation, Clay: clay content, DEM: digital elevation model, ECa: apparent electrical conductivity, HSI.S: saturation component of the RGB to HSI transform, NDCI: normalized difference clay index, SBI: soil brightness index, x,y: spatial coordinates.


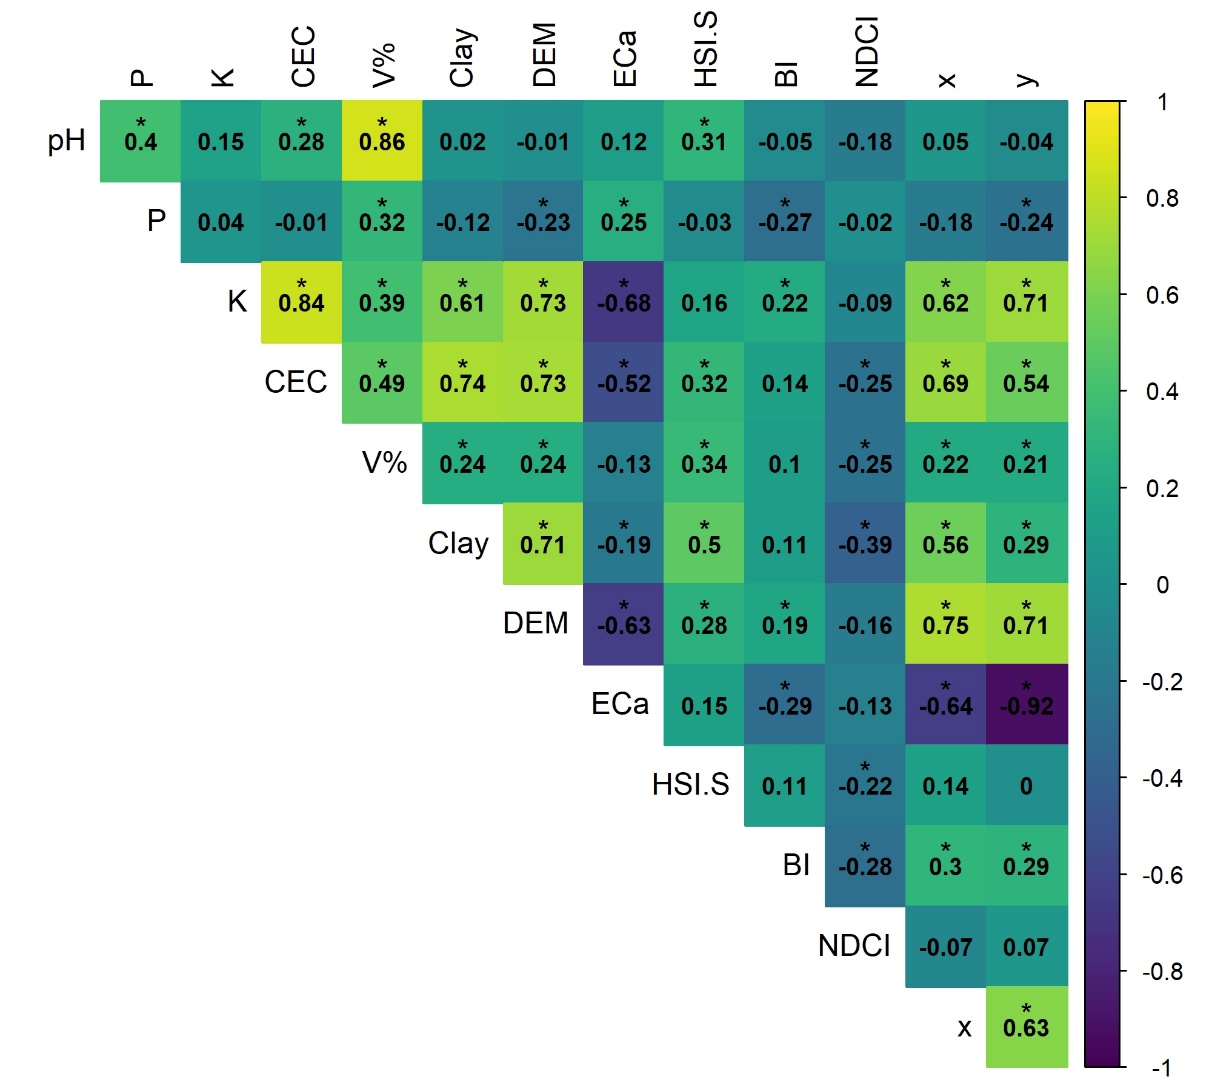


FigS8. Correlation matrix for São José farm in 1 sample ha-1. P: phosphorus, K: potassium, CEC: cation exchange capacity, V%: base saturation, Clay: clay content, DEM: digital elevation model, ECa: apparent electrical conductivity, HSI.S: saturation component of the RGB to HSI transform, NDCI: normalized difference clay index, SBI: soil brightness index, x,y: spatial coordinates.


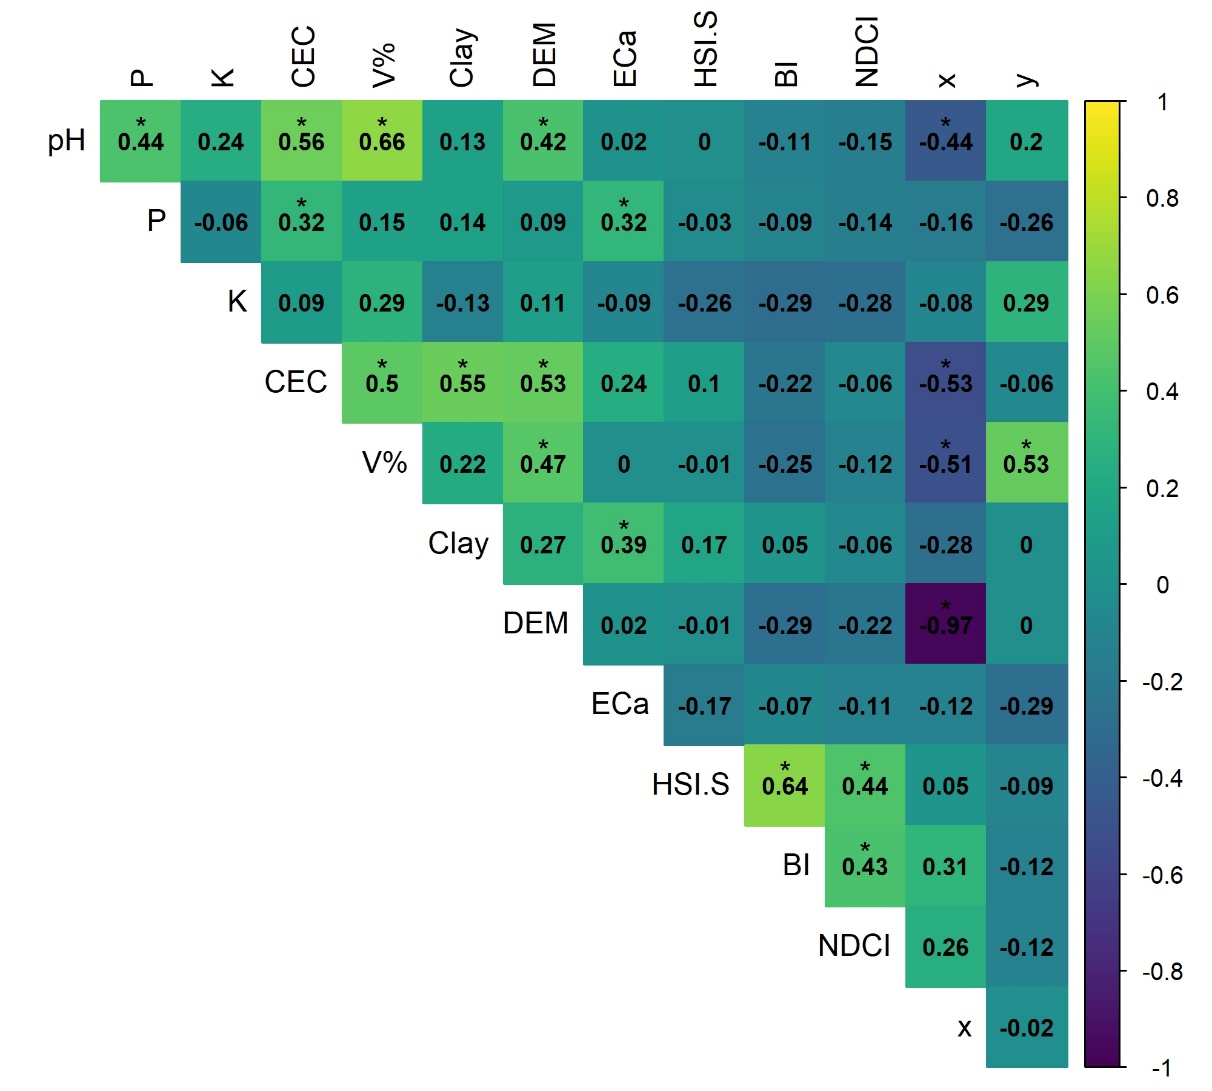


FigS9. Correlation matrix for Campina farm in 0.2 samples ha-1. P: phosphorus, K: potassium, CEC: cation exchange capacity, V%: base saturation, Clay: clay content, DEM: digital elevation model, ECa: apparent electrical conductivity, HSI.S: saturation component of the RGB to HSI transform, NDCI: normalized difference clay index, SBI: soil brightness index, x,y: spatial coordinates.


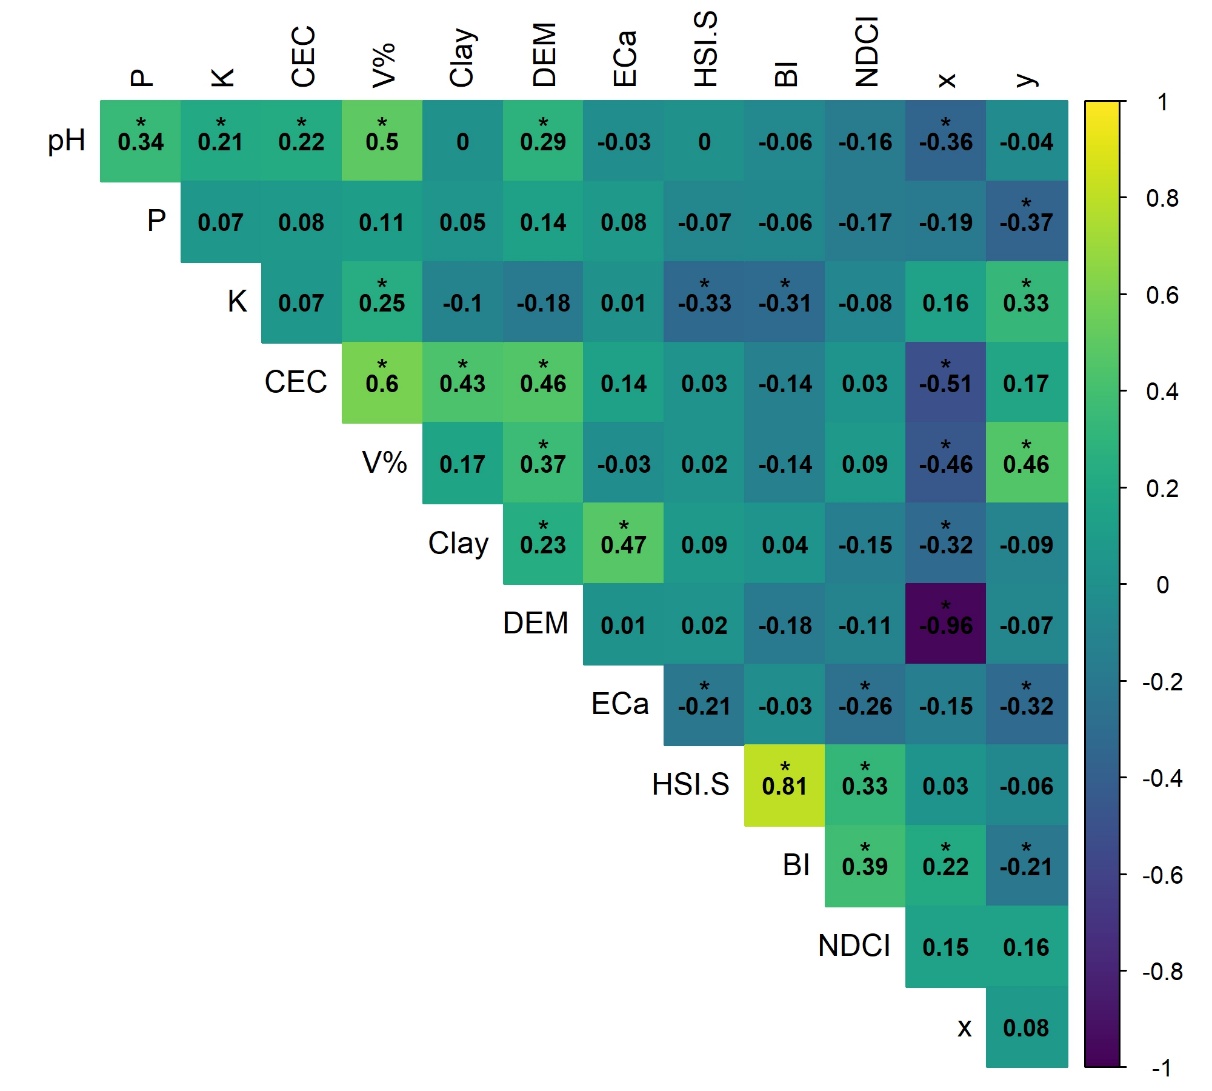


Fig10. Correlation matrix for Campina farm in 0.5 samples ha-1. P: phosphorus, K: potassium, CEC: cation exchange capacity, V%: base saturation, Clay: clay content, DEM: digital elevation model, ECa: apparent electrical conductivity, HSI.S: saturation component of the RGB to HSI transform, NDCI: normalized difference clay index, SBI: soil brightness index, x,y: spatial coordinates.


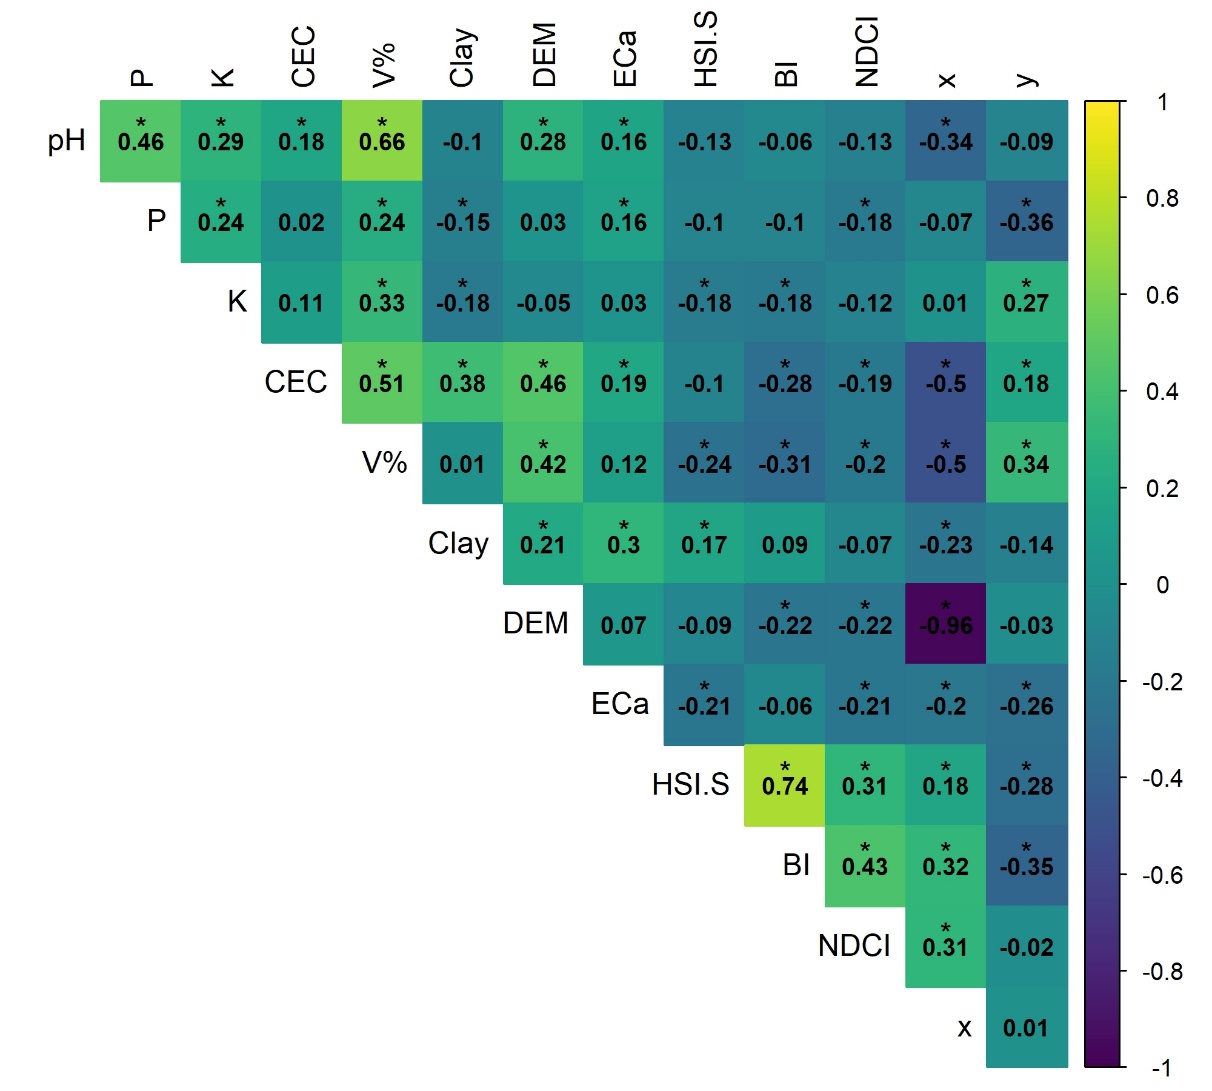


FigS11. Correlation matrix for Campina farm in 1 sample ha-1. P: phosphorus, K: potassium, CEC: cation exchange capacity, V%: base saturation, Clay: clay content, DEM: digital elevation model, ECa: apparent electrical conductivity, HSI.S: saturation component of the RGB to HSI transform, NDCI: normalized difference clay index, SBI: soil brightness index, x,y: spatial coordinates.

Table S1. Comparison of interpolation methods: percentage difference in LCCC from the best method in scenarios of <50 samples. Bold values indicate methods within the 5% threshold.

| **Scenario** | **Spatial structure** | **Best performing method** | **LCCC difference relative to best method (%)** | | | | | |
| --- | --- | --- | --- | --- | --- | --- | --- | --- |
| **IDW** | **TPS** | **OK** | **RK** | **RFE** | **SVM** |
| <50 | R_VL | TPS | 76.84 | 0.00 | - | 43.95 | 62.37 | 100.00 |
| R_L | TPS | 25.46 | 0.00 | - | 53.64 | 59.90 | 55.69 |
| R_M | TPS | 70.29 | 0.00 | - | 27.87 | 33.86 | 67.94 |
| R_H | - | - | - | - | - | - | - |
| R_VH | IDW | 0.00 | **1.04** | - | 7.45 | 21.15 | 58.26 |
| C_VL | - | - | - | - | - | - | - |
| C_L | - | - | - | - | - | - | - |
| C_M | - | - | - | - | - | - | - |
| C_H | TPS | 16.41 | 0.00 | - | 10.59 | 16.86 | 38.66 |
| C_VH | TPS | **1.18** | 0.00 | - | **3.46** | 8.29 | 10.06 |

Table S2. Comparison of interpolation methods: percentage difference in LCCC from the best method in scenarios of 50 to 100 samples. Bold values indicate methods within the 5% threshold.

| **Scenario** | **Spatial structure** | **Best performing method** | **LCCC difference relative to best method (%)** | | | | | |
| --- | --- | --- | --- | --- | --- | --- | --- | --- |
| **IDW** | **TPS** | **OK** | **RK** | **RFE** | **SVM** |
| 50 - 100 | R_VL | - | - | - | - | - | - | - |
| R_L | TPS | 51.59 | 0.00 | 43.94 | 36.09 | 40.32 | 55.79 |
| R_M | TPS | 9.88 | 0.00 | 26.84 | 37.94 | 41.37 | 58.97 |
| R_H | - | - | - | - | - | - | - |
| R_VH | SVM | 32.18 | 26.45 | 24.16 | 26.44 | 33.09 | 0.00 |
| C_VL | - | - | - | - | - | - | - |
| C_L | - | - | - | - | - | - | - |
| C_M | - | - | - | - | - | - | - |
| C_H | TPS | **0.78** | 0.00 | **0.75** | 8.55 | 18.17 | 29.12 |
| C_VH | OK | 6.91 | 5.25 | 0.00 | **0.93** | **1.78** | **2.68** |

Table S3. Comparison of interpolation methods: percentage difference in LCCC from the best method in scenarios of ≥ 100 samples. Bold values indicate methods within the 5% threshold.

| **Scenario** | **Spatial structure** | **Best performing method** | **LCCC difference relative to best method (%)** | | | | | |
| --- | --- | --- | --- | --- | --- | --- | --- | --- |
| **IDW** | **TPS** | **OK** | **RK** | **RFE** | **SVM** |
| ≥ 100 | C_VL | - | - | - | - | - | - | - |
| C_L | TPS | 10.05 | 0.00 | 17.83 | 8.97 | 11.84 | 35.46 |
| C_M | TPS | 8.13 | 0.00 | 21.22 | 12.09 | 12.82 | **0.82** |
| C_H | IDW | 0.00 | **3.32** | **1.15** | **0.76** | **0.93** | 8.85 |
| C_VH | RK | 11.87 | 8.04 | **5.00** | 0.00 | **0.01** | **2.78** |
